# Supplementary material
Source: publisher figshare collection journal article supplement (https://acs.figshare.com/ndownloader/files/25473652)
Supplement: Supplementary file 1 [file 25473652]

## **Supporting Information**

### **Diethylenetriamine-Functionalized CdS Nanoparticles Decorated on Cu<sub>2</sub>S**

#### **Snowflake Microparticles for Photocatalytic Hydrogen Production**

Xudong Li <sup>a</sup>, Kai Dai <sup>a,\*</sup>, Chengsi Pan <sup>b,\*</sup>, Jinfeng Zhang <sup>a,\*</sup>

<sup>a</sup> Key Laboratory of Green and Precise Synthetic Chemistry and Applications, Ministry of Education, Anhui Province Key Laboratory of Pollutant Sensitive Materials and Environmental Remediation, School of Physics and Electronic Information, Huaibei Normal University, Huaibei, Anhui 235000, P.R. China

<sup>b</sup> School of Chemical and Material Engineering, Jiangnan University, Wuxi, 214122, P. R. China

\* Corresponding authors. Fax: +86-561-3803256

Email address: daikai940@chnu.edu.cn (K. Dai); cspan@jiangnan.edu.cn (C. Pan);

jfzhang@chnu.edu.cn (J. Zhang)

## **Experimental**

### **1.1 Materials**

Cadmium chloride ( $\text{CdCl}_2 \cdot 2.5\text{H}_2\text{O}$ ), ethylenediamine (EDA), thiourea ( $\text{CH}_4\text{N}_2\text{S}$ ), copper chloride dihydrate ( $\text{CuCl}_2 \cdot 2\text{H}_2\text{O}$ ), Chloroplatinic acid ( $\text{H}_2\text{PtCl}_6 \cdot 6\text{H}_2\text{O}$ ), sodium sulfide ( $\text{Na}_2\text{S}$ ), sodium sulfite ( $\text{Na}_2\text{SO}_3$ ) and diethylenetriamine (DETA) was obtained from Shanghai Chemical Reagent Corp. (P.R. China).

### **1.2 Preparation of $\text{Cu}_2\text{S}$ snowflakes**

$\text{Cu}_2\text{S}$  snowflakes were prepared at a low temperature according to the precipitation method of Zhang et al<sup>1</sup>.

### **1.3 Preparation of CU/CD composite.**

Firstly,  $\text{CdCl}_2 \cdot 2.5\text{H}_2\text{O}$  (1 mmol) and thiourea (3 mmol) were dissolved into 36mL of a mixed solution of diethylenetriamine and deionized water at a ratio of 2: 1. The mixed solution was fully stirred. Then, a certain amount of  $\text{Cu}_2\text{S}$  is added to the uniformly mixed solution, and the theoretical mass ratio of  $\text{Cu}_2\text{S}$  to CD is controlled to 0, 3, 10, and 20 wt%, respectively. Followed that, it was transferred to an autoclave and heated at 373K for 8 h. The precipitate formed was filtered and washed several times with deionized water. Then, the washed precipitate was dried in an oven at 333 K for 8h. The CU/CD composites were named as CU/CD-1, CU/CD-2, and CU/CD-3 according to different qualities of  $\text{Cu}_2\text{S}$  investment.

### **1.4 Preparation of CdS nanoroads (CdS NRs)**

1 mmol of  $\text{CdCl}_2 \cdot 2.5\text{H}_2\text{O}$  and 2 mmol of thiourea were added to 30ml of ethylenediamine, and then stirred for 1 hour. After stirring, the solution was

transferred to the autoclave. Heat at 180°C for 24h. After cooling to room temperature, the yellow precipitate in the autoclave was repeatedly washed with water several times, and then finally placed in a 333K oven to dry for 8h to obtain CdS nanorods.

### **1.5 Characterization**

Analysis of catalyst structure by X-ray diffraction (XRD Rigaku D/MAX 24000) pattern. Scanning electron microscope (SEM Hitachi Regulus8220) and Transmission electron microscope (TEM JEOL JEM-2010) were obtained on the topographic features and element mapping images of the photocatalyst. The specific surface area used the BET method to obtain nitrogen adsorption data by using a surface analyzer (ASAP2010). The Fluorescence spectrometer (FLS920) and the ultraviolet-visible spectrophotometer (DRS Hitachi UV-3600) were used to measure the diffuse reflection absorption spectrum (DRS) and photoluminescence (PL) of the sample. The surface structure of the catalyst was analyzed by X-ray photoelectron spectra (XPS Thermo ESCALAB 250) and Fourier transform infrared (FT-IR Nicolet 6700). The Brunauer-Emmett-Teller (BET) specific surface area values were subject to nitrogen adsorption data at 77 K obtained by a Micromeritics ASAP 2010 system with a multipoint BET method. The electrochemical measurement was recorded by the Shanghai Chenhua CHI-660D workstation in a three-electrode cell system. The electrolyte solution is 1.0 M Na<sub>2</sub>SO<sub>4</sub>.

### **1.6 Photocatalytic activity evaluation**

Typically, 20 mg of catalyst was dispersed in 50 mL of a mixed solution containing 0.35 M Na<sub>2</sub>S and 0.25 M Na<sub>2</sub>SO<sub>3</sub>. Pt (0.6 wt%) was directly photodeposited on the

photocatalysts by dissolving  $\text{H}_2\text{PtCl}_6 \cdot 6\text{H}_2\text{O}$  into the reactant suspension.  $\text{N}_2$  was passed through the reactor for more than 30 min to remove air. The light source used a 300 W xenon lamp (CEL-HXF300, Ceaulight, China) equipped with a 420 nm filter. The distance from light source to catalyst surface is 20 cm. The light intensity at 420 nm is  $3.74 \text{ mW/cm}^2$ . An online gas chromatograph (GC-7900) with 1 mL of gas was extracted after 1 hour of light exposure to test the hydrogen production. In order to investigate the reusability performance of the samples, the used photocatalyst was washed via DW after each light for 3 h to eliminate any possible adsorbed species from the previous cycle, and then dried at 333 K. The recovered photocatalyst was used for the next  $\text{H}_2$  evolution under the same conditions. The apparent quantum efficiency (QE) of hydrogen produced at 420 nm was estimated by the following formula:

$$\begin{aligned}
 \text{QE}(\%) &= \frac{\text{number of racted electrons}}{\text{number of incident photons}} \times 100 \\
 &= \frac{\text{number of evolved } \text{H}_2 \text{ molecules} \times 2}{\text{number of incident photons}} \times 100
 \end{aligned} \tag{1}$$

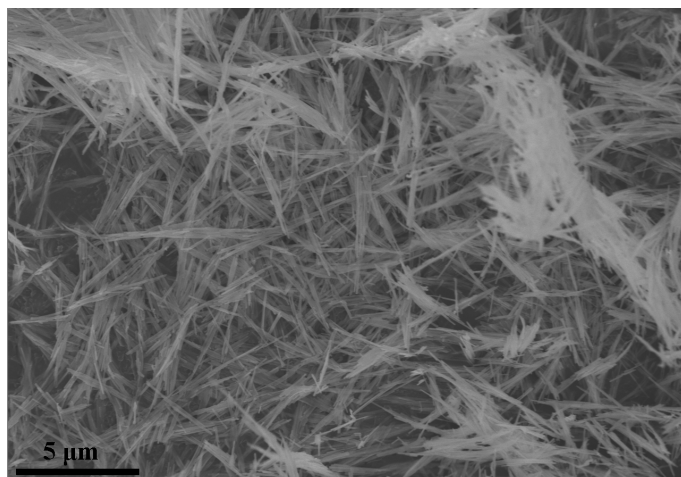

**Figure S1.** SEM images of CdS NRs.

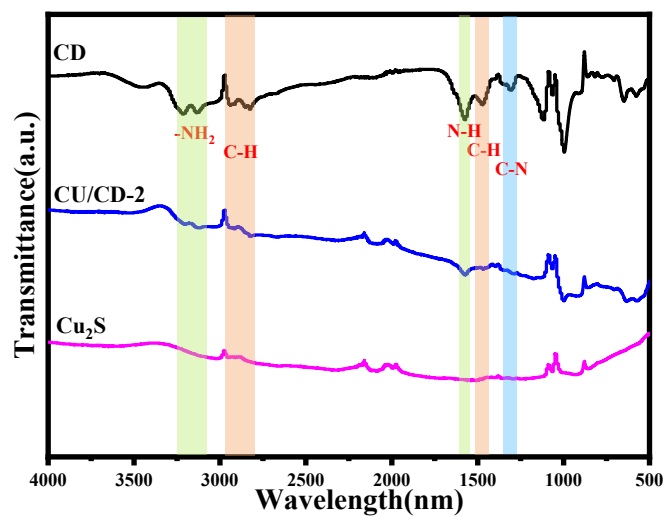

**Figure S2.** FT-IR spectra of different samples.

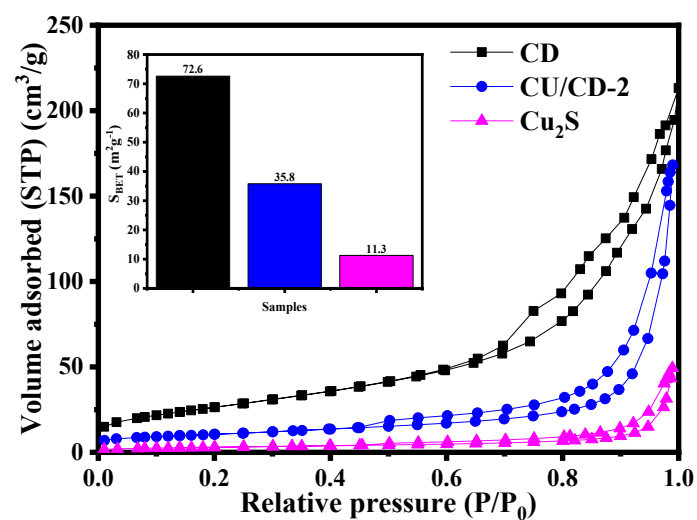

**Figure S3.** Nitrogen adsorption-desorption isotherms of different samples, inset: BET specific surface area ( $S_{\text{BET}}$ ) of different samples.

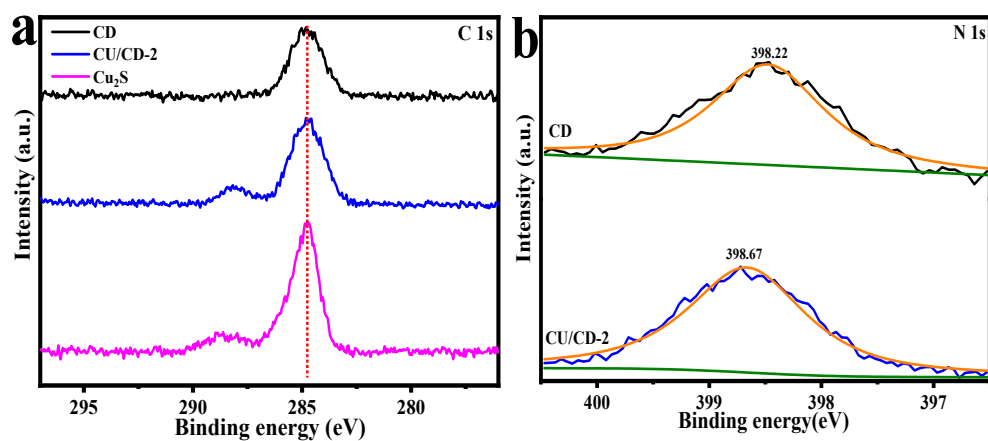

**Figure S4.** XPS spectra of (a) C 1s of different photocatalysts, and (b) N 1s of CU/CD-2 and CD.



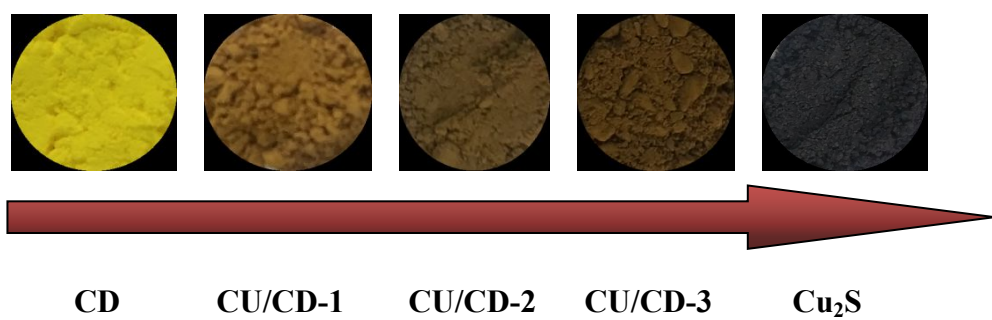

**Figure S5.** The color transformation of the photocatalysts.

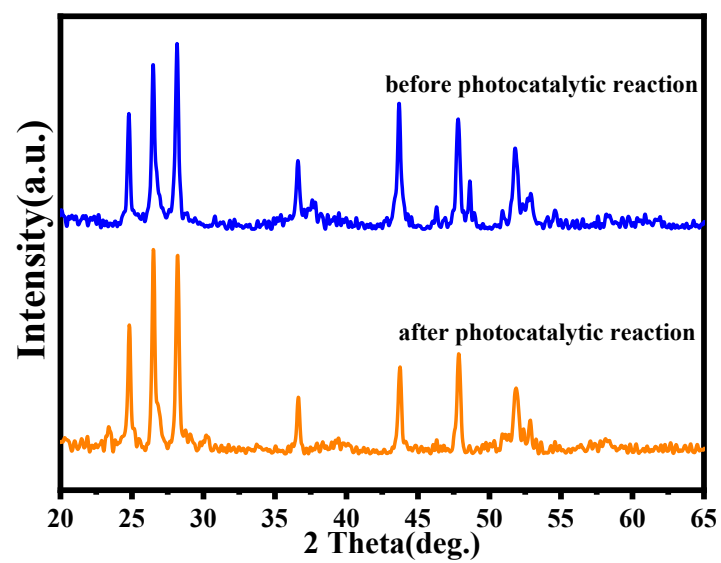

**Figure S6.** XRD patterns of CU/CD-2 before and after the photocatalytic reaction.

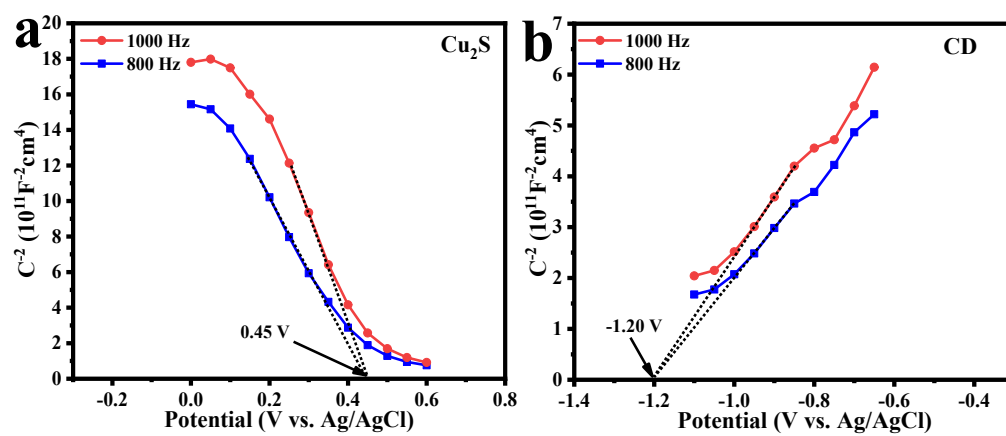

**Figure S7.** (a) Mott-Schottky plot of  $\text{Cu}_2\text{S}$ . (b) Mott-Schottky plot of CD.

**Table S1** The atomic percentage of each element in CU/CD-2.

| Elements in CU/CD-2 by XPS | Atomic % |
|----------------------------|----------|
| C                          | 21.12    |
| Cd                         | 28.36    |
| N                          | 8.04     |
| O                          | 9.44     |
| S                          | 30.63    |
| Cu                         | 2.41     |

**Table S2** Comparisons of photocatalytic activities of different samples.

| Photocatalyst                                | Light source                  | Sacrificial agent                                                     | H <sub>2</sub> production (μmol·h <sup>-1</sup> ·g <sup>-1</sup> ) | Ref.      |
|----------------------------------------------|-------------------------------|-----------------------------------------------------------------------|--------------------------------------------------------------------|-----------|
| Cu <sub>1.94</sub> /CdS                      | 500W<br>Xe-lamp               | 0.1 M<br>Na <sub>2</sub> S+0.3 M<br>Na <sub>2</sub> SO <sub>3</sub>   | 71                                                                 | 2         |
| CdS/ZnS/PdS                                  | 225W<br>Xe-lamp<br>λ ≥ 320 nm | 0.35 M<br>Na <sub>2</sub> S+0.25 M<br>Na <sub>2</sub> SO <sub>3</sub> | 1021                                                               | 3         |
| CdS/Ti <sup>3+</sup> /N-Ti<br>O <sub>2</sub> | 300W<br>Xe-lamp<br>λ ≥ 420 nm | 0.35 M<br>Na <sub>2</sub> S+0.25 M<br>Na <sub>2</sub> SO <sub>3</sub> | 1119                                                               | 4         |
| S <sup>2-</sup> -CdS/CdS                     | 350W<br>Xe-lamp<br>λ ≥ 420 nm | 0.35 M<br>Na <sub>2</sub> S+0.25 M<br>Na <sub>2</sub> SO <sub>3</sub> | 1789                                                               | 5         |
| NiS/CdS/TiO <sub>2</sub>                     | 300W<br>Xe-lamp<br>λ ≥ 420 nm | 0.35 M<br>Na <sub>2</sub> S+0.25 M<br>Na <sub>2</sub> SO <sub>3</sub> | 2149                                                               | 6         |
| CdS/ZnS                                      | 300W<br>Xe-lamp<br>λ > 422 nm | 0.35 M<br>Na <sub>2</sub> S+0.25 M<br>Na <sub>2</sub> SO <sub>3</sub> | 820                                                                | 7         |
| CU/CD-2                                      | 300W<br>Xe-lamp<br>λ ≥ 420 nm | 0.35 M<br>Na <sub>2</sub> S+0.25 M<br>Na <sub>2</sub> SO <sub>3</sub> | 9000                                                               | This work |

## Reference

1. Zhang, X.; Guo, Y.; Tian, J.; Sun, B.; Liang, Z.; Xu, X.; Cui, H., Controllable growth of MoS<sub>2</sub> nanosheets on novel Cu<sub>2</sub>S snowflakes with high photocatalytic activity. *Appl. Catal., B* **2018**, 232, 355-364.
2. Zhu, D.; Ye, H.; Liu, Z.; Liu, J.; Fu, H.; Huang, Y.; Teng, F.; Wang, Z.; Tang, A.,

- Seed-mediated growth of heterostructured Cu<sub>1.94</sub>S-MS (M = Zn, Cd, Mn) and alloyed CuNS<sub>2</sub> (N = In, Ga) nanocrystals for use in structure- and composition-dependent photocatalytic hydrogen evolution. *Nanoscale* **2020**, *12* (10), 6111-6120.
3. Sun, G.; Mao, S.; Ma, D.; Zou, Y.; Lv, Y.; Li, Z.; He, C.; Cheng, Y.; Shi, J.-W., One-step vulcanization of Cd(OH)Cl nanorods to synthesize CdS/ZnS/PdS nanotubes for highly efficient photocatalytic hydrogen evolution. *J. Mater. Chem. A* **2019**, *7* (25), 15278-15287.
  4. Qin, Y.; Li, H.; Lu, J.; Meng, F.; Ma, C.; Yan, Y.; Meng, M., Nitrogen-doped hydrogenated TiO<sub>2</sub> modified with CdS nanorods with enhanced optical absorption, charge separation and photocatalytic hydrogen evolution. *Chem. Eng. J.* **2020**, *384*, 123275.
  5. Zhong, W.; Wu, X.; Wang, P.; Fan, J.; Yu, H., Homojunction CdS Photocatalysts with a Massive S<sup>2-</sup>-Adsorbed Surface Phase: One-Step Facile Synthesis and High H<sub>2</sub>-Evolution Performance. *ACS Sustainable Chem. Eng.* **2019**, *8* (1), 543-551.
  6. Li, N.; Huang, H.; Bibi, R.; Shen, Q.; Ngulube, R.; Zhou, J.; Liu, M., Noble-metal-free MOF derived hollow CdS/TiO<sub>2</sub> decorated with NiS cocatalyst for efficient photocatalytic hydrogen evolution. *Appl. Surf. Sci.* **2019**, *476*, 378-386.
  7. Lian, Z.; Sakamoto, M.; Kobayashi, Y.; Tamai, N.; Ma, J.; Sakurai, T.; Seki, S.; Nakagawa, T.; Lai, M. W.; Haruta, M.; Kurata, H.; Teranishi, T., Anomalous Photoinduced Hole Transport in Type I Core/Mesoporous-Shell Nanocrystals for Efficient Photocatalytic H<sub>2</sub> Evolution. *ACS nano* **2019**, *13* (7), 8356-8363.
